# Supplementary material for: The construction of porous chitosan microspheres with high specific surface area by using agarose as the pore-forming agent and further functionalized application in bioseparation
Source: Royal Society of Chemistry journal article supplement (doi:10.1039/c9tb01157a), 2019-01-01
Supplement: c9tb01157a1.pdf [file c9tb01157a1.pdf]

## Supporting Information

### Construction of porous chitosan microspheres with high specific surface area by using agarose as pore-forming agent and further functionalized application in bioseparation

Liangzhi Qiao, Liangshen Zhao, Chao Liang, Kaifeng Du\*

*Department of Pharmaceutical & Biological Engineering, School of Chemical Engineering, Sichuan University, Chengdu 610065, P. R. China*

Corresponding author:

Tel.: +86-28-85405221; Fax: +86-28-85405221

Email: kfdu@scu.edu.cn

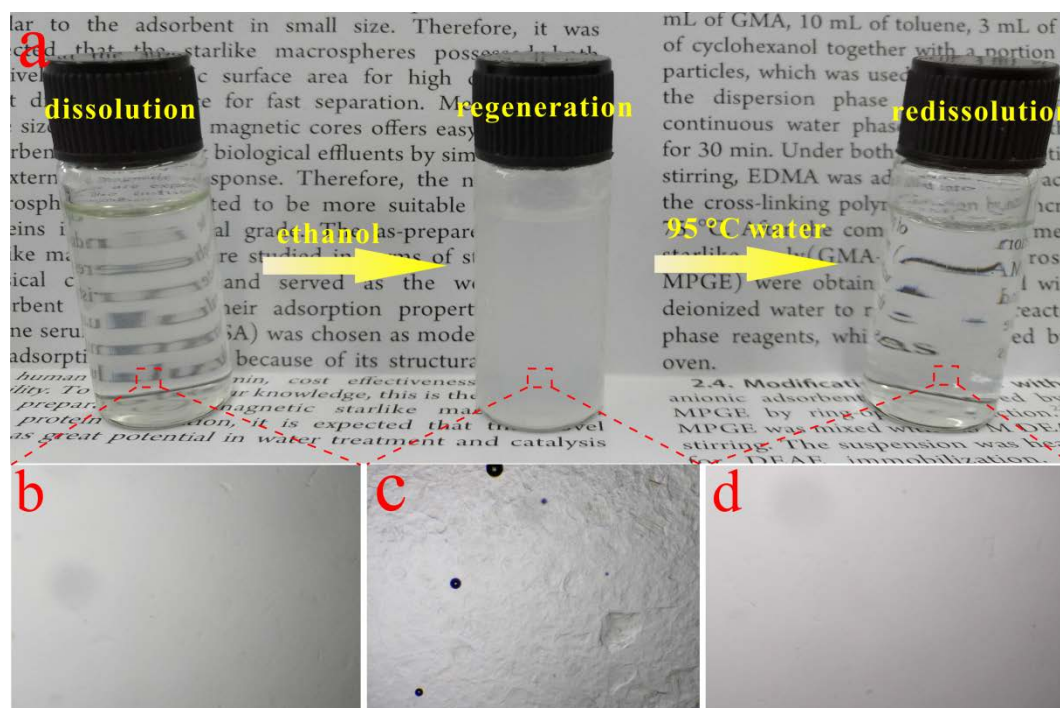

**Figure S1.** Photographs of the dissolution-regeneration-redissolution process of agarose (a), in which left solution is 4wt% agarose solution in LiOH/urea system,

middle suspension is regenerated agarose solution, and right solution is 4wt% agarose solution in hot water; and the corresponding optical microscopy images (b, c, d).

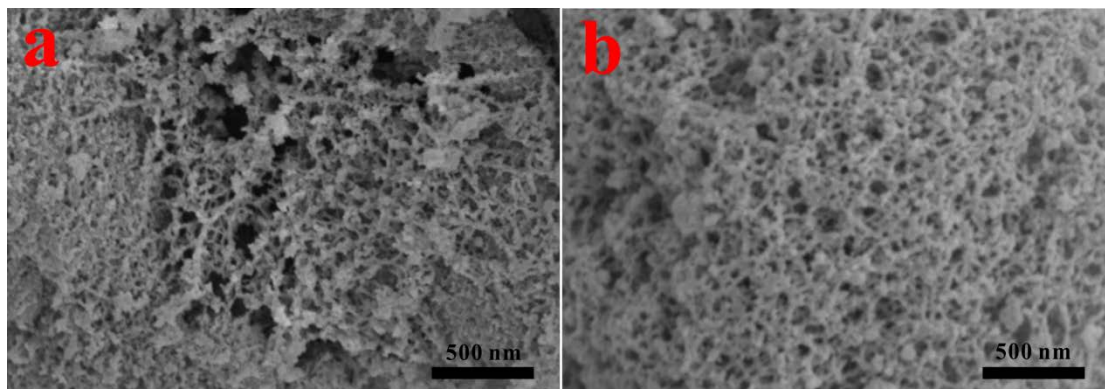

**Figure S2.** SEM images of the inter structure of PCM-15 (a) and Cu<sup>2+</sup>PCM-15 (b).

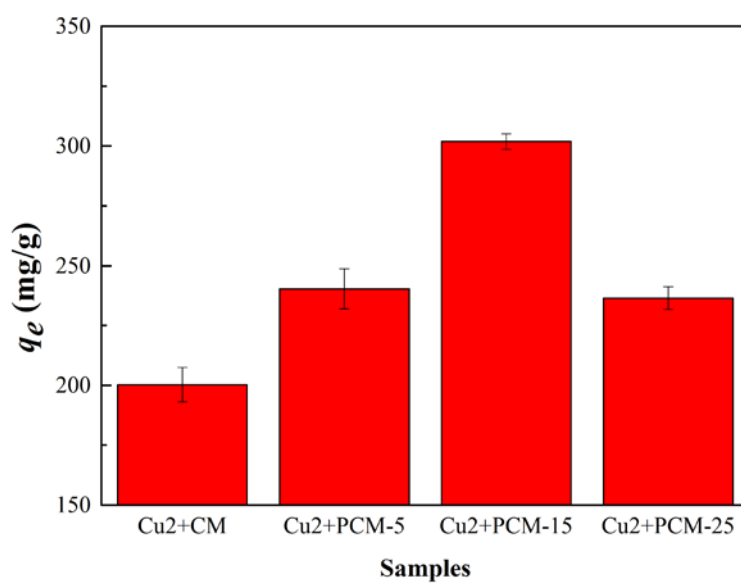

**Figure S3.** Adsorption capacity of BHB on adsorbents (conditions: 10 mL BHB concentration: 1000 mg/L, incubation time: 60 min, adsorbents dosage: 10 mg, pH: 6.5).
